# Supplementary material
Source: publisher figshare collection journal article supplement (https://diabetesjournals.figshare.com/articles/dataset/_/24020868)
Supplement: Supplementary file 1 [file 1]

**Supplementary Table 5:** Table of the multiple regression model (ANOVA II) expressing the peroneal nerve conduction velocity (NCV) as a function of height, standard deviation of mean glucose (Glucose SD) representative for glucose variability, and the interaction between these two explanatory variables.

|                                                                         | <b>SS</b> | <b>df</b> | <b>F</b> | <b>p</b> |
|-------------------------------------------------------------------------|-----------|-----------|----------|----------|
| Height (cm)                                                             | 314.05    | 1         | 37.61    | <0.001   |
| Glucose variability (Glucose SD)                                        | 86.90     | 1         | 10.41    | 0.002    |
| Height x Glucose SD                                                     | 59.77     | 1         | 7.16     | 0.010    |
| Residuals                                                               | 367.45    | 44        |          |          |
| n = 48, R <sup>2</sup> = 0.580, F <sub>(3, 44)</sub> = 20.29, p < 0.001 |           |           |          |          |
