# Supplementary material
Source: publisher figshare collection journal article supplement (https://diabetesjournals.figshare.com/articles/dataset/_/24020868)
Supplement: Supplementary file 2 [file 1]

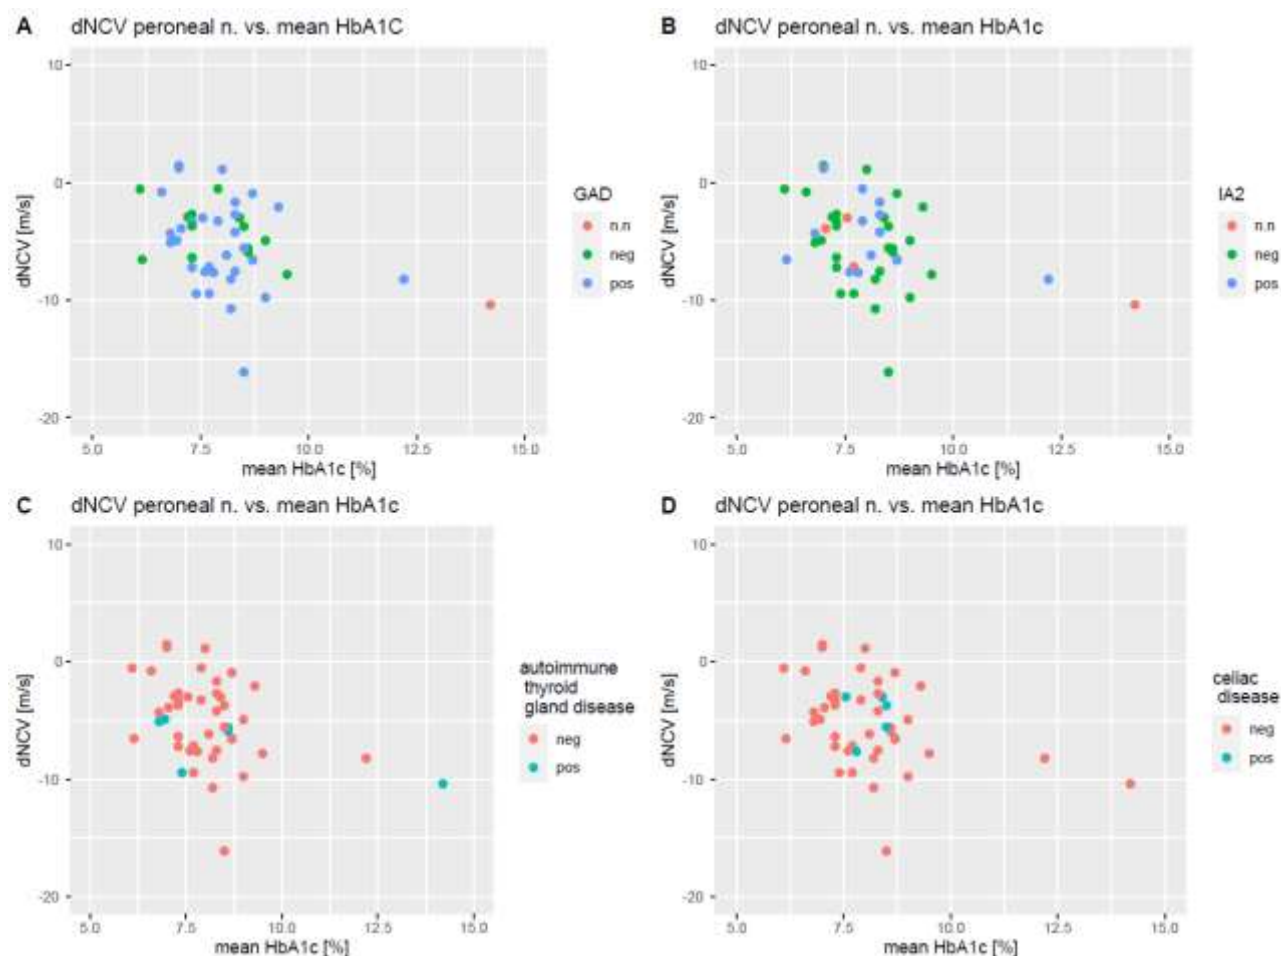

**Supplementary Figure 4:** Panels A to D show scatter plots of the mean HbA1c on the x-axis and the residual of the peroneal nerve conduction velocity (dNCV) on the y-axis. In Panels A and B, the diabetes group participants are presented according to whether the presence of the glutamic acid decarboxylase (GAD) or tyrosine phosphatase related islet 2 (IA2) antibody level was not tested (red dots), below the detection limit (green dots), or above the detection limit (blue dots). In Panels C and D, the diabetes group participants are presented according to whether they were diagnosed (blue dots) or not diagnosed (red dots) with autoimmune thyroid gland disease or coeliac disease. To convert the HbA1c percentage to mmol/mol, please use <http://www.ngsg.org/convert1.asp>.
