# Supplementary material
Source: publisher figshare collection journal article supplement (https://diabetesjournals.figshare.com/articles/dataset/_/24020868)
Supplement: Supplementary file 3 [file 1]

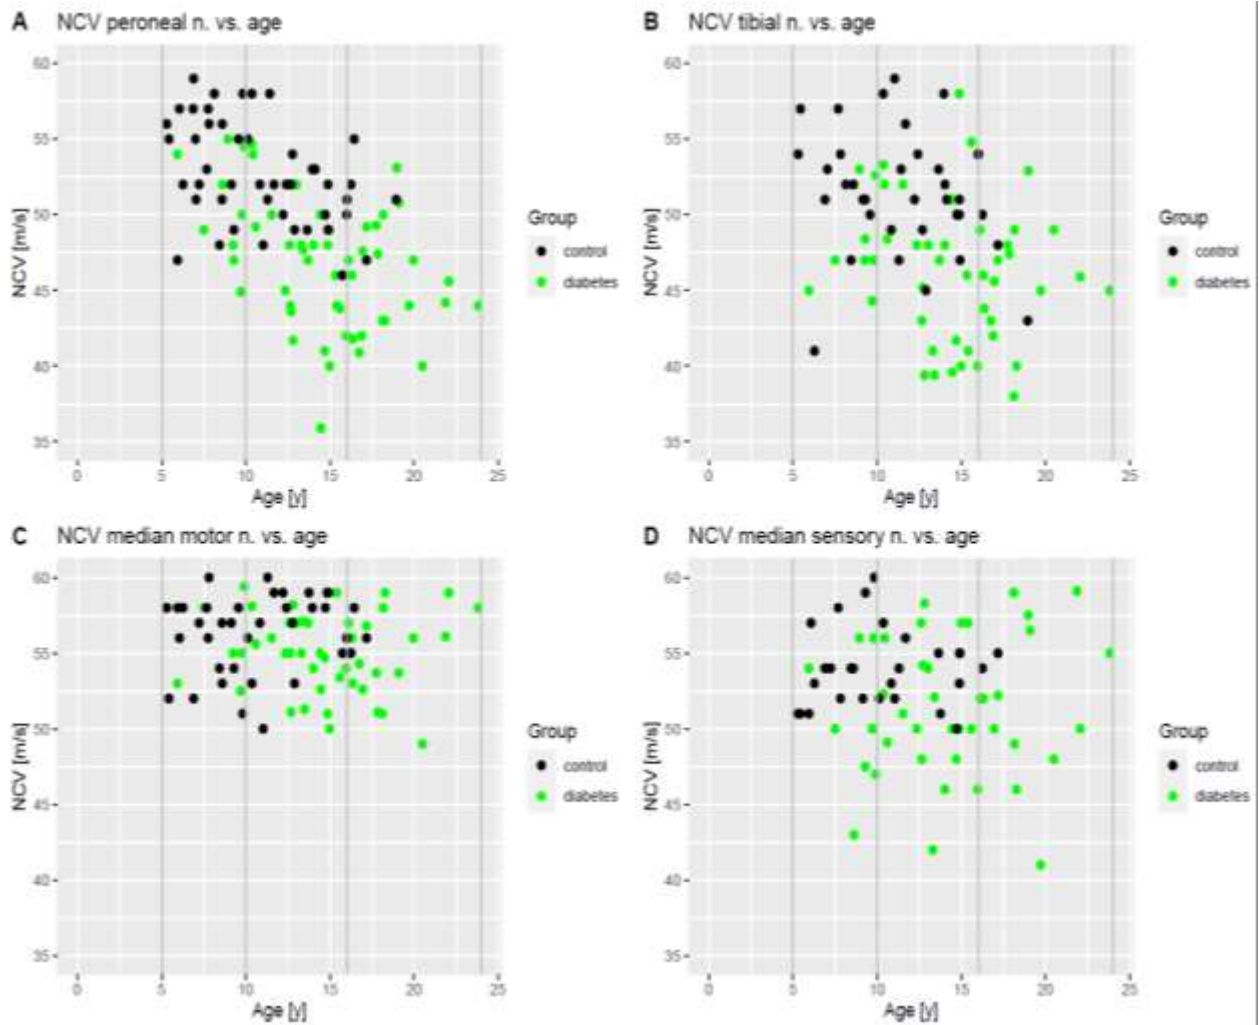

**Supplementary Figure 2:** Panels A to D show scatter plots relating age on the x-axis to the nerve conduction velocity (NCV) of the peroneal, tibial, median motor, and sensory nerves (n.) on the y-axis. In all panels, the dots are colored according to control group (black dots) respectively diabetes group participants (green dots). The vertical lines represent the study population's subgroups 5.0 to <10.0 years, 10.0 to <16.0 years, and 16.0 to <24.0 years.
