# Supplementary material
Source: publisher figshare collection journal article supplement (https://diabetesjournals.figshare.com/articles/dataset/_/24020868)
Supplement: Supplementary file 4 [file 1]

**Supplementary Table 2: Raw data of the control group**

| Demographics |         |     |             |             | Nerve conduction velocity [m/s] |              |                    |                      |
|--------------|---------|-----|-------------|-------------|---------------------------------|--------------|--------------------|----------------------|
| ID           | age [y] | sex | height [cm] | weight [kg] | peroneal nerve                  | tibial nerve | median motor nerve | median sensory nerve |
| 1            | 6.9     | f   | 119.0       | 22.7        | 57.0                            | n.t.         | n.t.               | n.t.                 |
| 2            | 16.0    | f   | 164.5       | 51.0        | 51.0                            | 54.0         | n.t.               | n.t.                 |
| 3            | 8.4     | m   | 150.7       | 44.5        | 48.0                            | 47.0         | 54.0               | 54.0                 |
| 4            | 7.8     | f   | 140.0       | n.t.        | 56.0                            | 54.0         | 60.0               | 52.0                 |
| 5            | 13.8    | f   | 161.0       | 62.0        | n.t.                            | n.t.         | 59.0               | 51.0                 |
| 6            | 18.9    | f   | 160.0       | 55.0        | 51.0                            | 43.0         | n.t.               | n.t.                 |
| 7            | 13.7    | m   | 160.0       | 53.0        | 49.0                            | 53.0         | 61.0               | 55.0                 |
| 10           | 12.7    | f   | n.t.        | n.t.        | 52.0                            | 49.0         | n.t.               | n.t.                 |
| 11           | 6.3     | m   | 111.0       | 16.7        | 52.0                            | 41.0         | 58.0               | 53.0                 |
| 12           | 14.8    | f   | 155.0       | 38.0        | n.t.                            | n.t.         | 59.0               | n.t.                 |
| 13           | 15.7    | m   | 184.0       | 65.9        | 46.0                            | n.t.         | 55.0               | n.t.                 |
| 15           | 14.9    | f   | 164.3       | 56.0        | 49.0                            | 50.0         | 62.0               | 55.0                 |
| 16           | 16.3    | m   | 163.5       | 59.3        | 52.0                            | 50.0         | 55.0               | 54.0                 |
| 17           | 12.9    | f   | 138.3       | 32.8        | 49.0                            | 45.0         | 53.0               | 61.0                 |
| 18           | 14.0    | f   | 166.0       | 61.3        | 53.0                            | 58.0         | 58.0               | 63.0                 |
| 19           | 16.0    | f   | 159.3       | 42.4        | 50.0                            | 54.0         | 56.0               | 63.0                 |
| 20           | 9.6     | f   | 146.3       | 55.0        | 55.0                            | 50.0         | 58.0               | 64.0                 |
| 21           | 11.4    | f   | 157.0       | 35.5        | 58.0                            | 53.0         | 61.0               | 63.0                 |
| 22           | 7.0     | m   | 123.0       | 22.0        | 55.0                            | n.t.         | n.t.               | n.t.                 |
| 23           | 12.8    | f   | 160.0       | 64.3        | 54.0                            | n.t.         | 57.0               | n.t.                 |
| 24           | 10.1    | f   | 149.8       | 36.4        | 55.0                            | n.t.         | 56.0               | 52.0                 |
| 25           | 17.2    | f   | 169.8       | 68.7        | 47.0                            | 48.0         | 56.0               | 55.0                 |
| 26           | 7.8     | f   | 127.5       | 33.4        | 57.0                            | n.t.         | 56.0               | 66.0                 |
| 27           | 8.6     | f   | 128.1       | 25.6        | 56.0                            | n.t.         | 53.0               | 64.0                 |
| 28           | 6.1     | f   | 116.7       | 21.5        | 57.0                            | n.t.         | 56.0               | 57.0                 |
| 29           | 14.0    | f   | 162.5       | 69.5        | 53.0                            | 52.0         | 62.0               | 65.0                 |
| 30           | 11.3    | f   | 149.3       | 40.0        | 51.0                            | 47.0         | 60.0               | 54.0                 |
| 31           | 9.1     | m   | 152.8       | 48.8        | 52.0                            | 51.0         | 57.0               | 52.0                 |
| 32           | 8.6     | m   | 135.0       | 28.0        | 51.0                            | 52.0         | 57.0               | 54.0                 |
| 33           | 5.9     | m   | 111.0       | 16.2        | 47.0                            | n.t.         | 58.0               | 51.0                 |
| 34           | 16.4    | m   | 159.0       | 55.0        | 55.0                            | n.t.         | 58.0               | n.t.                 |
| 35           | 10.4    | m   | 158.0       | 44.0        | 58.0                            | 58.0         | 53.0               | 57.0                 |
| 36           | 14.7    | f   | 163.0       | 53.5        | 50.0                            | 50.0         | 58.0               | 50.0                 |
| 37           | 12.2    | m   | 167.1       | 63.7        | 50.0                            | 51.0         | 59.0               | 67.0                 |
| 38           | 5.3     | f   | 113.5       | 20.8        | 56.0                            | 54.0         | 58.0               | 51.0                 |
| 39           | 7.7     | m   | 124.0       | 24.7        | 53.0                            | 57.0         | 58.0               | 58.0                 |
| 40           | 14.9    | f   | 169.5       | 53.8        | 49.0                            | 47.0         | 59.0               | 55.0                 |
| 41           | 11.0    | m   | 155.0       | 47.5        | 48.0                            | 59.0         | 50.0               | 52.0                 |
| 42           | 11.7    | f   | 146.5       | 33.4        | 52.0                            | 56.0         | 59.0               | 56.0                 |
| 43           | 9.8     | f   | 132.5       | 28.2        | 58.0                            | n.t.         | 51.0               | 60.0                 |
| 44           | 5.4     | f   | 115.2       | 19.6        | 55.0                            | 57.0         | 52.0               | 51.0                 |

|    |      |   |       |      |      |      |      |      |
|----|------|---|-------|------|------|------|------|------|
| 45 | 6.9  | f | 115.2 | 19.6 | 59.0 | 51.0 | 52.0 | 54.0 |
| 46 | 9.3  | m | 148.0 | 52.5 | 49.0 | 51.0 | 54.0 | 59.0 |
| 48 | 8.1  | f | n.t.  | n.t. | 58.0 | 52.0 | n.t. | n.t. |
| 49 | 10.8 | f | 149.3 | 48.0 | 52.0 | 49.0 | 57.0 | 53.0 |
| 50 | 14.9 | f | 166.0 | 66.0 | 52.0 | 51.0 | 68.0 | 53.0 |
| 51 | 7.2  | m | 122.3 | 24.2 | 52.0 | n.t. | 57.0 | 54.0 |
| 52 | 12.4 | f | 157.0 | 66.8 | 52.0 | 54.0 | 58.0 | 61.0 |
| 53 | 14.1 | f | 166.0 | 78.0 | 53.0 | 51.0 | 63.0 | 69.0 |
| 54 | 7.0  | f | 126.0 | 22.0 | 51.0 | 53.0 | 61.0 | 63.0 |

f – female, m – male, n.t. – not tested
