# Supplementary material
Source: publisher figshare collection journal article supplement (https://diabetesjournals.figshare.com/articles/dataset/_/24020868)
Supplement: Supplementary file 5 [file 1]

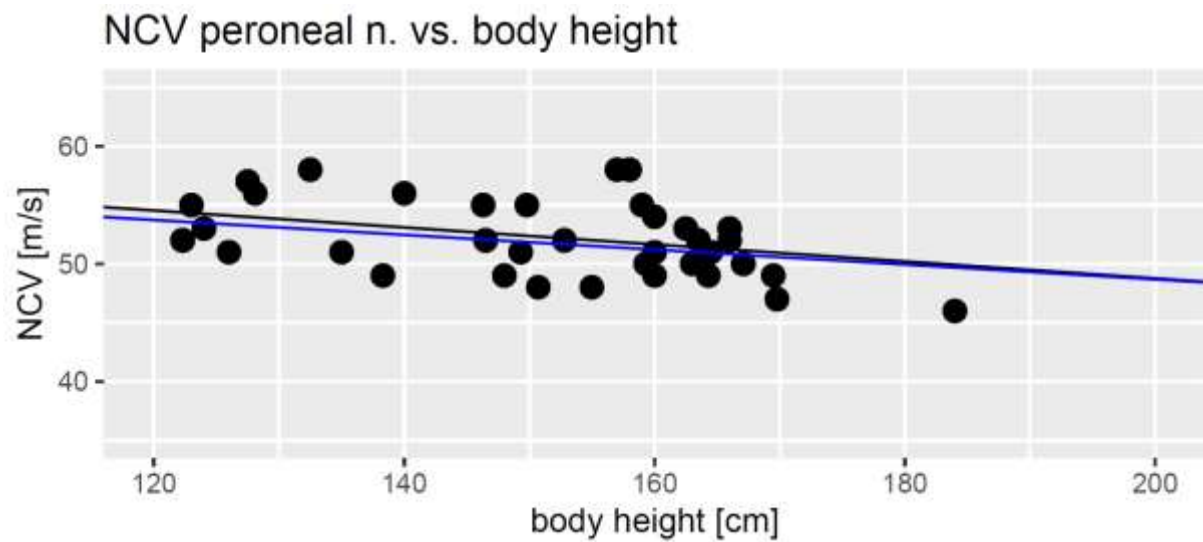

**Supplementary Figure 1:** Close correlation between body height on the x-axis and peroneal nerve conduction velocity (NCV) on the y-axis among our control group participants (black regression line and dots,  $n = 50$ ). This was visually identical to the model presented by Hyllienmark et al. (1995) with  $n = 128$ , shown by the blue regression line.
