# Supplementary material
Source: publisher figshare collection journal article supplement (https://diabetesjournals.figshare.com/articles/dataset/_/24020868)
Supplement: Supplementary file 6 [file 1]

**Supplementary Table 3: Characteristics of the diabetes and control subgroups**

|                        | Age 5.0 - <10.0 y           |                             |                          | Age 10.0 - <16.0 y          |                             |                          | Age 16.0 - <24.0 y          |                            |                          |
|------------------------|-----------------------------|-----------------------------|--------------------------|-----------------------------|-----------------------------|--------------------------|-----------------------------|----------------------------|--------------------------|
|                        | diabetes<br>group<br>n=9*   | control<br>group<br>n=21*   | p-<br>value <sup>†</sup> | diabetes<br>group<br>n=24*  | control<br>group<br>n=23*   | p-<br>value <sup>†</sup> | diabetes<br>group<br>n=20*  | control<br>group<br>n=6*   | p-<br>value <sup>†</sup> |
| <b>Age (y)</b>         | 8.8<br>(5.9,<br>9.9)        | 7.6<br>(5.3,<br>9.8)        | 0.028                    | 13.5<br>(10.4,<br>16.0)     | 13.0<br>(10.1,<br>15.8)     | 0.4                      | 18.6<br>(16.1,<br>23.8)     | 16.8<br>(16.0,<br>19.0)    | 0.024                    |
| <b>Male<br/>sex</b>    | 5 (56%)                     | 9 (43%)                     | 0.700                    | 13<br>(54%)                 | 5<br>(22%)                  | 0.022                    | 9 (45%)                     | 2<br>(33%)                 | >0.900                   |
| <b>Height<br/>(cm)</b> | 137.3<br>(120.4 -<br>154.2) | 127.9<br>(111.0 -<br>152.8) | 0.063                    | 162.7<br>(137.0 –<br>186.5) | 159.3<br>(138.3 -<br>184.0) | 0.300                    | 170.7<br>(159.0 –<br>184.6) | 162.7<br>(159.0,<br>169.8) | 0.031                    |
| <b>Weight<br/>(kg)</b> | 34.6<br>(20.7 –<br>53.1)    | 29.0<br>(16.2 –<br>55.0)    | 0.130                    | 57.0<br>(25.5 -<br>84.4)    | 53.2<br>(32.8 –<br>78.0)    | 0.500                    | 68.5<br>(41.8,<br>94.3)     | 55.2<br>(42.4 –<br>68.7)   | 0.014                    |

\* Median (Range); n (%)

<sup>†</sup> correlation is calculated by the Wilcoxon rank sum test
