# Supplementary material
Source: publisher figshare collection journal article supplement (https://diabetesjournals.figshare.com/articles/dataset/_/24020868)
Supplement: Supplementary file 7 [file 1]

**Supplementary Table 4: Nerve conduction velocity data per subgroup and tested nerve**

|                                              | Age 5.0 - <10.0 years           |                          |              | Age 10.0 - <16.0 years          |                           |              | Age 16.0 - <24.0 years         |                           |              |
|----------------------------------------------|---------------------------------|--------------------------|--------------|---------------------------------|---------------------------|--------------|--------------------------------|---------------------------|--------------|
|                                              | dia-<br>betes<br>group<br>n=21* | control<br>group<br>n=9* | p-<br>value† | dia-<br>betes<br>group<br>n=23* | control<br>group<br>n=24* | p-<br>value† | dia-<br>betes<br>group<br>n=6* | control<br>group<br>n=20* | p-<br>value† |
| <b>Pero-<br/>neal n.<br/>[m/s]</b>           | 50.0<br>(48.0,<br>54.0)         | 55.0<br>(52.0,<br>57.0)  | 0.019        | 47.0<br>(43.7,<br>48.6)         | 52.0<br>(49.0,<br>53.0)   | <0.001       | 45.8<br>(43.0,<br>48.0)        | 51.0<br>(50.3,<br>51.8)   | 0.005        |
| <b>Tibial<br/>n. [m/s]</b>                   | 47.0<br>(46.5,<br>49.5)         | 52.0<br>(51.0,<br>54.0)  | 0.054        | 46.5<br>(41.0,<br>50.4)         | 51.0<br>(49.3,<br>53.8)   | 0.003        | 45.9<br>(43.8,<br>48.0)        | 50.0<br>(48.0,<br>54.0)   | 0.071        |
| <b>Median<br/>motor<br/>n. [m/s]</b>         | 58.0<br>(55.0,<br>60.9)         | 57.0<br>(54.0,<br>58.0)  | 0.300        | 55.0<br>(53.9,<br>57.0)         | 59.0<br>(57.0,<br>60.8)   | 0.006        | 56.0<br>(53.4,<br>58.0)        | 56.0<br>(55.8,<br>56.5)   | >0.900       |
| <b>Median<br/>sen-<br/>sory n.<br/>[m/s]</b> | 50.0<br>(47.5,<br>56.0)         | 54.0<br>(52.3,<br>59.8)  | 0.047        | 51.0<br>(49.1,<br>56.0)         | 55.0<br>(53.0,<br>62.0)   | 0.005        | 52.0<br>(49.5,<br>57.0)        | 55.0<br>(54.5,<br>59.0)   | 0.300        |

\* Median (Interquartile Range)

† correlation is calculated by the Wilcoxon rank sum test
