# Supplementary material
Source: publisher figshare collection journal article supplement (https://diabetesjournals.figshare.com/articles/dataset/_/24020868)
Supplement: Supplementary file 9 [file 1]

**Supplementary Table 1: Raw Data of the diabetes group**

| Demographics |         |     |             |             | Diabetes data |     |            |                  |      | Nerve conduction velocity [m/s] |              |                    |                      |
|--------------|---------|-----|-------------|-------------|---------------|-----|------------|------------------|------|---------------------------------|--------------|--------------------|----------------------|
| ID           | age [y] | sex | height [cm] | weight [kg] | duration [y]  | AB  | Hb A1c [%] | mean Hb A1c* [%] | VPT  | peroneal nerve                  | tibial nerve | median motor nerve | median sensory nerve |
| 1            | 16.9    | m   | 183.0       | 73.8        | 9.5           | pos | 10.8       | 9.5              | 8/8  | 42.0                            | 42.0         | n.t.               | n.t.                 |
| 2            | 22.1    | f   | 161.5       | 41.8        | 18.4          | neg | 9.0        | 8.6              | <8/8 | 45.6                            | 45.9         | 59.0               | 50.0                 |
| 3            | 16.3    | f   | 169.3       | 76.9        | 4.9           | pos | 7.5        | 7.0              | n.t. | 46.0                            | 46.0         | 56.0               | 52.0                 |
| 4            | 20.0    | m   | 184.6       | 82.5        | 7.9           | pos | 7.1        | 7.3              | <8/8 | 47.0                            | n.t.         | 56.0               | 65.0                 |
| 5            | 8.6     | f   | 135.5       | 36.0        | 1.1           | pos | 6.6        | -                | <8/8 | 52.0                            | n.t.         | 61.0               | 43.0                 |
| 6            | 14.7    | m   | 170.9       | 25.5        | 13.1          | pos | 7.9        | 9.0              | <8/8 | 41.0                            | 41.7         | 54.7               | 48.0                 |
| 7            | 20.5    | m   | 175.8       | 59.4        | 6.1           | pos | 6.5        | 14.2             | <8/8 | 40.0                            | 49.0         | 49.0               | 48.0                 |
| 8            | 14.0    | m   | 164.8       | 76.4        | 8.7           | pos | 10.2       | 7.9              | <8/8 | 48.0                            | 48.0         | 54.0               | 46.0                 |
| 10           | 9.3     | m   | 138.2       | 28.4        | 1.4           | pos | 8.2        | 7.3              | 8/8  | 47.0                            | 48.4         | 60.9               | 47.5                 |
| 11           | 14.9    | f   | 164.3       | 60.8        | 1.5           | pos | 7.0        | 7.3              | 8/8  | 48.0                            | 58.0         | 51.0               | 50.0                 |
| 12           | 16.0    | m   | 186.5       | 84.4        | 8.0           | pos | 8.5        | 8.3              | <8/8 | 42.0                            | 40.0         | 54.0               | 46.0                 |
| 13           | 18.2    | m   | 174.1       | 75.6        | 10.8          | pos | 7.1        | 7.9              | 8/8  | 50.0                            | 49.0         | 58.0               | 49.0                 |
| 14           | 12.8    | m   | 186.4       | 76.4        | 1.0           | pos | 6.3        | -                | n.t. | 41.7                            | 39.4         | 58.2               | 58.3                 |
| 15           | 13.4    | m   | 172.3       | 65.5        | 10.0          | pos | 8.4        | 8.4              | n.t. | 47.7                            | 39.4         | 57.1               | 52.1                 |
| 16           | 17.2    | m   | 169.8       | 93.7        | 11.4          | pos | 8.7        | 8.3              | <8/8 | 49.2                            | 47.0         | 56.8               | 52.2                 |
| 17           | 21.9    | m   | 183.2       | 94.3        | 17.9          | pos | 8.4        | 8.6              | <8/8 | 44.2                            | n.t.         | 56.1               | 59.1                 |
| 18           | 18.3    | f   | 165.4       | 58.8        | 6.3           | pos | 7.8        | 8.2              | <8/8 | 43.0                            | 40.0         | 59.0               | 46.0                 |
| 19           | 17.0    | m   | 173.0       | 60.5        | 1.9           | pos | 12.7       | 8.4              | n.t. | 47.6                            | 45.6         | 52.6               | 50.0                 |
| 21           | 15.0    | f   | 171.5       | 79.7        | 7.8           | pos | 9.2        | 8.2              | 8/8  | 40.0                            | 40.0         | 50.0               | 57.0                 |
| 22           | 12.6    | m   | 159.5       | 65.4        | 1.9           | pos | 6.8        | 7.3              | n.t. | 48.0                            | n.t.         | 57.0               | 57.0                 |
| 24           | 7.5     | m   | 123.2       | 22.0        | 5.3           | pos | 7.4        | 8.5              | 8/8  | 49.0                            | 47.0         | 58.0               | 50.0                 |
| 25           | 13.3    | f   | 156.7       | 50.4        | 2.5           | pos | 6.9        | 7.1              | 8/8  | 48.0                            | 41.0         | 55.0               | 42.0                 |
| 26           | 10.4    | f   | 148.2       | 39.8        | 1.1           | pos | 7.6        | -                | n.t. | 54.0                            | 52.0         | 63.0               | 56.0                 |
| 27           | 16.1    | m   | 180.8       | 66.8        | 5.5           | pos | 7.9        | 7.6              | <8/8 | 47.0                            | 49.0         | 57.0               | 52.0                 |
| 28           | 5.9     | f   | 120.4       | 20.7        | 1.8           | pos | 6.2        | 6.6              | 8/8  | 54.0                            | 45.0         | 53.0               | 54.0                 |
| 29           | 15.3    | f   | 176.8       | 66.2        | 3.5           | pos | 6.6        | 6.8              | <8/8 | 46.0                            | 46.0         | 68.0               | n.t.                 |
| 30           | 19.0    | f   | 160.0       | 62.0        | 10.5          | pos | 7.4        | 7.0              | <8/8 | 53.1                            | 52.9         | 62.2               | 57.5                 |
| 31           | 23.8    | m   | 178.6       | 72.0        | 15.7          | pos | 7.6        | 8.1              | <8/8 | 44.0                            | 45.0         | 58.0               | 55.0                 |
| 32           | 12.7    | m   | 165.7       | 53.9        | 8.6           | pos | 7.6        | 7.6              | <8/8 | 43.6                            | 45.2         | 51.1               | 54.2                 |
| 33           | 13.5    | f   | 162.0       | 49.1        | 2.6           | pos | 9.2        | 7.0              | 8/8  | n.t.                            | n.t.         | 51.3               | n.t.                 |
| 34           | 9.7     | m   | 154.2       | 53.1        | 1.8           | pos | 7.6        | 7.3              | <8/8 | 44.9                            | 44.3         | 52.5               | 50.0                 |
| 35           | 16.8    | f   | 176.4       | 64.1        | 2.3           | pos | 8.1        | 7.7              | <8/8 | 40.9                            | 43.0         | 54.3               | n.t.                 |
| 36           | 16.4    | f   | 165.0       | 75.2        | 4.3           | pos | 10.1       | 7.4              | <8/8 | 41.8                            | 43.8         | 53.0               | n.t.                 |
| 37           | 17.8    | f   | 163.4       | 57.1        | 6.7           | pos | 7.9        | 9.3              | 8/8  | 49.3                            | 48.0         | 53.7               | n.t.                 |

| Demographics |         |     |             |             | Diabetes data |     |            |                  |      | Nerve conduction velocity [m/s] |              |                    |                      |
|--------------|---------|-----|-------------|-------------|---------------|-----|------------|------------------|------|---------------------------------|--------------|--------------------|----------------------|
| ID           | age [y] | sex | height [cm] | weight [kg] | duration [y]  | AB  | Hb A1c [%] | mean Hb A1c* [%] | VPT  | peroneal nerve                  | tibial nerve | median motor nerve | median sensory nerve |
| 38           | 19.1    | f   | 159.0       | 70.2        | 11.7          | pos | 8.7        | 8.7              | n.t. | 50.8                            | n.t.         | 53.7               | 56.5                 |
| 39           | 15.6    | m   | 175.7       | 81.6        | 5.8           | pos | 9.1        | 8.7              | <8/8 | 43.8                            | 54.8         | 53.4               | 50.0                 |
| 40           | 17.8    | f   | 166.5       | 66.1        | 6.1           | pos | 8.1        | 8.5              | 8/8  | 47.4                            | 47.4         | 51.1               | n.t.                 |
| 41           | 12.7    | m   | 166.0       | 56.2        | 5.0           | pos | 8.1        | 7.7              | 8/8  | 44.0                            | 43.0         | 55.0               | 48.0                 |
| 42           | 9.8     | f   | 146.5       | 37.2        | 2.5           | pos | 7.5        | 8.3              | n.t. | 50.0                            | 47.0         | 55.0               | 56.0                 |
| 43           | 14.5    | f   | 155.2       | 59.9        | 4.9           | pos | 8.8        | 8.5              | <8/8 | 35.9                            | 39.6         | 52.6               | n.t.                 |
| 44           | 10.4    | f   | 137.0       | 37.1        | 1.3           | pos | 7.5        | 7.0              | 8/8  | 54.7                            | 53.3         | 58.1               | 52.3                 |
| 45           | 13.7    | f   | 154.3       | 48.3        | 7.4           | pos | 6.4        | 6.8              | <8/8 | 47.0                            | 47.0         | 57.0               | 62.0                 |
| 46           | 8.9     | m   | 136.0       | 33.0        | 0.6           | pos | 7.8        | -                | n.t. | 55.0                            | 53.0         | 62.0               | 56.0                 |
| 48           | 12.4    | m   | 161.3       | 52.8        | 2.7           | pos | 6.3        | 6.2              | 8/8  | 45.0                            | 48.0         | 55.0               | 50.0                 |
| 49           | 13.0    | m   | 148.6       | 47.7        | 2.0           | pos | 7.3        | 6.1              | <8/8 | 52.0                            | 48.0         | 57.0               | 54.0                 |
| 50           | 11.5    | f   | 143.8       | 37.5        | 3.4           | neg | 7.1        | 7.2              | 8/8  | 50.0                            | 52.0         | 56.0               | 51.0                 |
| 51           | 10.6    | m   | 137.8       | 35.5        | 4.6           | pos | 8.6        | 8.3              | 8/8  | 49.2                            | 48.4         | 55.6               | 49.1                 |
| 52           | 9.9     | m   | 138.2       | 31.4        | 6.9           | pos | 7.4        | 8.0              | 8/8  | 54.5                            | 52.6         | 59.4               | 47.0                 |
| 54           | 19.7    | f   | 160.0       | 58.7        | 16.3          | pos | 8.4        | 7.8              | 8/8  | 44.0                            | 45.0         | 65.0               | 41.0                 |
| 55           | 14.4    | m   | 164.5       | 60.8        | 0.7           | pos | 5.6        | -                | n.t. | 50.0                            | 51.0         | 55.0               | 50.0                 |
| 56           | 15.4    | f   | 174.2       | 58.2        | 10.2          | neg | 8.6        | 8.70             | <8/8 | 44.0                            | 41.0         | 59.0               | 57.0                 |
| 57           | 9.3     | f   | 143.7       | 50.0        | 4.4           | pos | 7.7        | 9.00             | <8/8 | 48.0                            | 47.0         | 55.0               | 61.0                 |
| 58           | 18.1    | f   | 165.3       | 61.1        | 5.5           | pos | 12.9       | 12.20            | n.t. | 43.0                            | 38.0         | 51.0               | 59.0                 |

AB – diabetes-specific antibody positive (pos)/ negative (neg), VPT – vibration perception threshold 8/8 = normal/ < 8/8 = reduced/ not tested (n.t.), f – female, m – male, \* = mean HbA1c of the last 5 annual check-ups
